# Supplementary material for: muciPRECON: multichannel preconcentrators for portable mid-infrared hydrocarbon gas sensors
Source: Royal Society of Chemistry journal article supplement (doi:10.1039/c6ay01447j), 2016-01-01
Supplement: c6ay01447j1.pdf [file c6ay01447j1.pdf]

## SUPPLEMENTARY MATERIAL

### Analytical Methods

# **muciPRECON: Multichannel Preconcentrators for Portable Mid-Infrared Hydrocarbon Gas Sensors**

V. Kokoric,<sup>a</sup> P.A. Wissel<sup>a</sup>, A. Wilk<sup>a</sup> and B. Mizaikoff<sup>a\*</sup>

\*Corresponding author: [boris.mizaikoff@uni-ulm.de](mailto:boris.mizaikoff@uni-ulm.de)

The following figures illustrate the flow path of the vapor phase samples or purging gas during the adsorption, desorption, measurement, and regeneration phase. In green colour, the path of the gas is shown, and in red the IR radiation path; at the bottom of the figure, the relevant operational parameters for each step are provided.

### Sampling

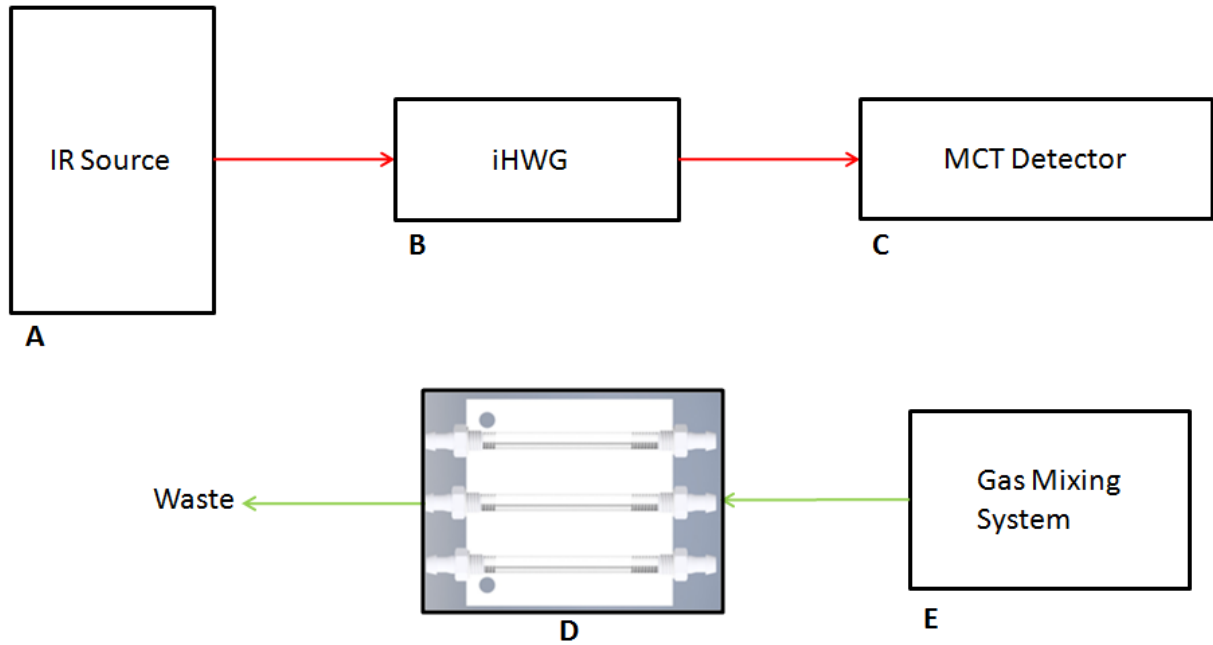

|                 |                                  |                                       |
|-----------------|----------------------------------|---------------------------------------|
| <b>Sampling</b> | <b>Temperature [°C]</b>          | <b>-10</b>                            |
|                 | <b>Flow [mLmin<sup>-1</sup>]</b> | <b>200</b>                            |
|                 | <b>Gas</b>                       | <b>N<sub>2</sub> / CH<sub>4</sub></b> |
|                 | <b>Volume [L]</b>                | <b>2</b>                              |

Figure 1: Sampling cycle.

## Heating (iPRECON) and Cleaning (iHWG)

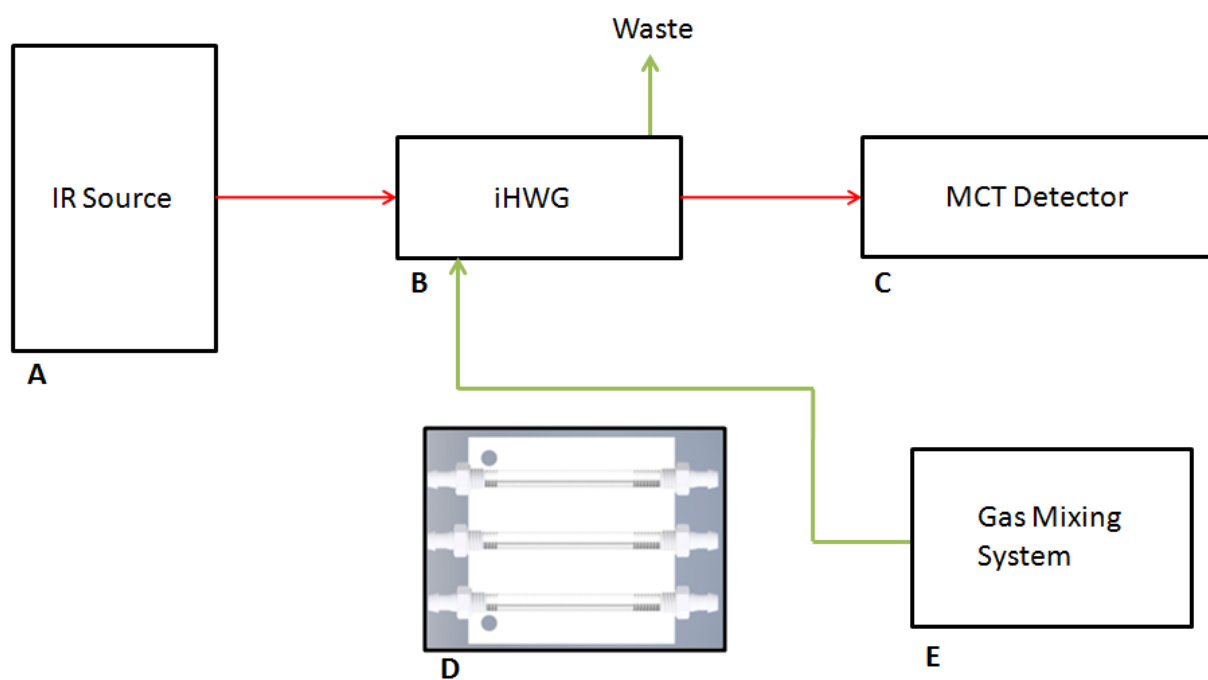

|                |                                  |                      |
|----------------|----------------------------------|----------------------|
| <b>Heating</b> | <b>Temperature [°C]</b>          | <b>-10 to 100</b>    |
|                | <b>Flow [mLmin<sup>-1</sup>]</b> | <b>10</b>            |
|                | <b>Gas</b>                       | <b>N<sub>2</sub></b> |

Figure 2: Heating cycle.

### Measuring

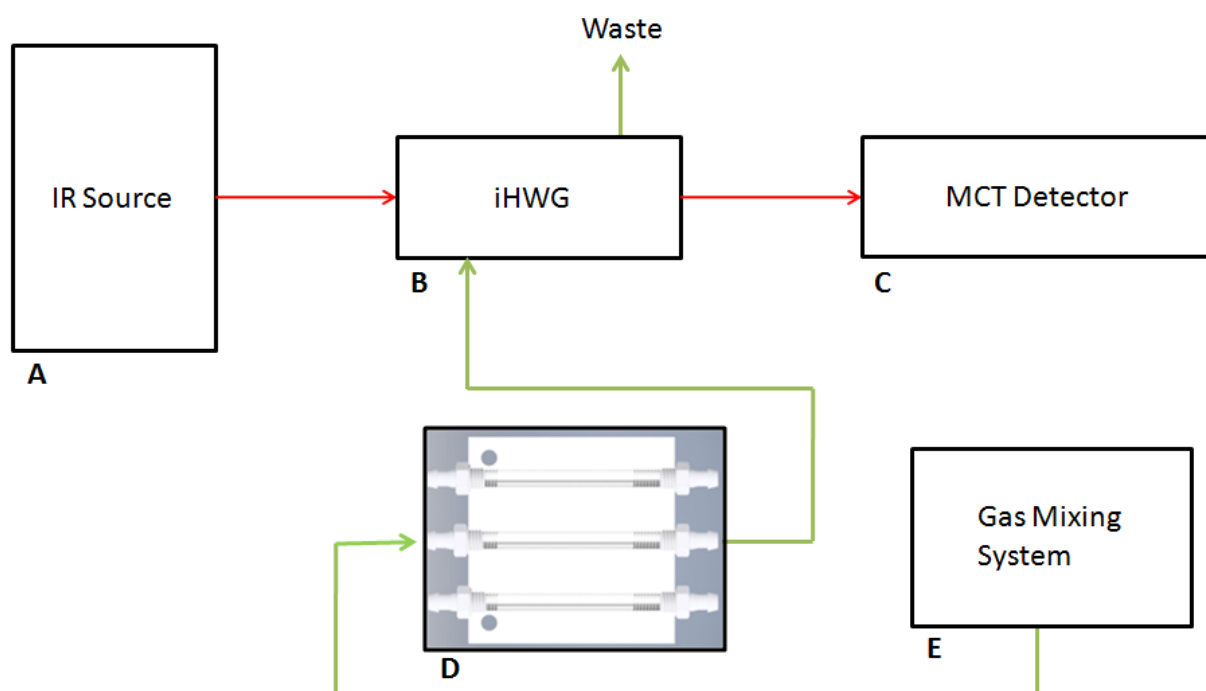

|                  |                             |                |
|------------------|-----------------------------|----------------|
| <b>Measuring</b> | Temperature [°C]            | 100            |
|                  | Flow [mLmin <sup>-1</sup> ] | 5              |
|                  | Gas                         | N <sub>2</sub> |

Figure 3: Measurement cycle.

## Pretreatment / Regeneration

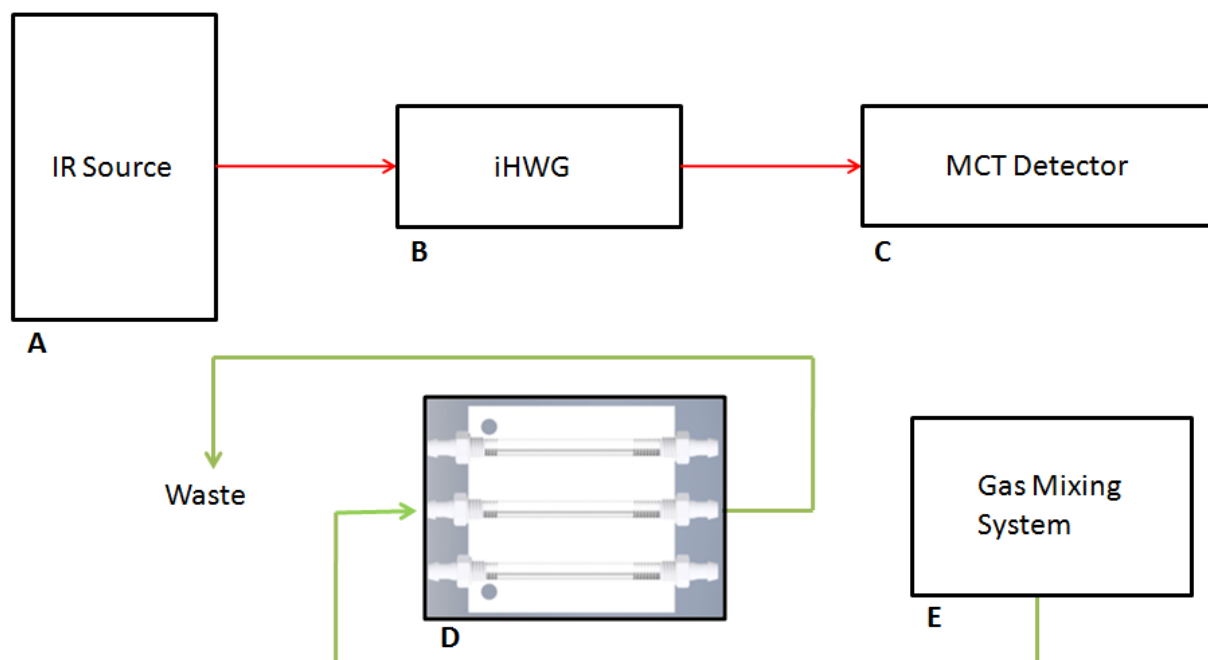

|                 |                                  |                      |
|-----------------|----------------------------------|----------------------|
| <b>Cleaning</b> | <b>Temperature [°C]</b>          | <b>100</b>           |
|                 | <b>Flow [mLmin<sup>-1</sup>]</b> | <b>200</b>           |
|                 | <b>Gas</b>                       | <b>N<sub>2</sub></b> |

Figure 4: Cleaning/regeneration cycle.
